# Supplementary material for: Discovery of novel trimethoxy-ring BRD4 bromodomain inhibitors: AlphaScreen assay, crystallography and cell-based assay
Source: Royal Society of Chemistry journal article supplement (doi:10.1039/c7md00083a), 2017-01-01
Supplement: c7md00083a1.pdf [file c7md00083a1.pdf]

## Discovery of novel trimethoxy-ring BRD4 bromodomain inhibitors :

### Alphascreening, crystallography, cell-based assay

Zhifeng Chen,<sup>#a,b,c</sup> Hao Zhang,<sup>#b,c</sup> Shien Liu,<sup>#b,c</sup> Yiqian Xie,<sup>d</sup> Hao Jiang,<sup>b,c</sup> Wenchao Lu,<sup>b,c</sup> Heng Xu,<sup>b,c</sup> Liyan Yue,<sup>b,c</sup> Yuanyuan Zhang,<sup>\*b</sup> Hong Ding,<sup>\*b,d</sup> Mingyue Zheng<sup>b</sup>, Kunqian Yu<sup>b</sup>, Kaixian Chen<sup>b</sup>, Hualiang Jiang<sup>a,b,c</sup> and Cheng Luo<sup>\*b,c</sup>

a. Drug Discovery and Design Center, State Key Laboratory of Drug Research, Shanghai Institute of Materia Medica, Chinese Academy of Sciences, 555 Zuchongzhi Road, Shanghai 201203, China

b. University of Chinese Academy of Sciences, 19 Yuquan Road, Beijing 100049, China

c. School of Life Science and Technology, ShanghaiTech University, 100 Haike Road, Shanghai 201210, China

d. Wuxi AppTech, 288 Fute Road, Shanghai 200131, China

Corresponding authors: E-mail: Yuanyuan Zhang, 10110700070@fudan.edu.cn, Hong Ding, hding@simm.ac.cn and Cheng Luo, cluo@simm.ac.cn

Tel: +86-21-50806600

# These authors contributed equally to this work.

## qRT-PCR

MV-4-11 cells were used to test whether DC-BD-03 inhibits the expression of genes c-Myc, CDK6, Bcl-2, which are closely related to the function of BRD4 (Fu, L.-l., et al.). Cells were treated with compounds of different concentrations or DMSO for 6h. Total RNA was extracted with the UNIQ-10 Column total RNA Purification Kit (Sangon Biotech). Using oligo (dT)20 primer and reverse transcriptase, cDNA was created by using the HiScript® II RT SuperMix for PCR (Vazyme). Reverse transcription and quantitative PCR were performed as the protocol that Vazyme supplied, using SYBR-GREEN (Vazyme, Low Rox for QuantStudio 6 Flex applied Biosystems by life technologies) for BCL2 (primer: GTTCAAATCAGCTATAACTGGAG; reverse: TAATATCAGTCTACTTCCTCTGTG), CDK6 (primer: TCTAACCTCAGTGGTCGTCAC ; reverse: TTCTCCTGGGAGTCCAATCAC), C-Myc (primer: GTGCTCCATGAGGAGACACC; reverse: GCACCTCTTGAGGACCAGTG), and  $\beta$ 2-microglobulin (primer: AAGTTGACTTACTGAAGAATGGAG; reverse: ATGCTGCTTACATGTCTCGATC) purchased from Sangon Biotech. Expression levels were normalized to that of  $\beta$ -Actin were calculated using a standard curve and the relative quantization method as described in ABI User.

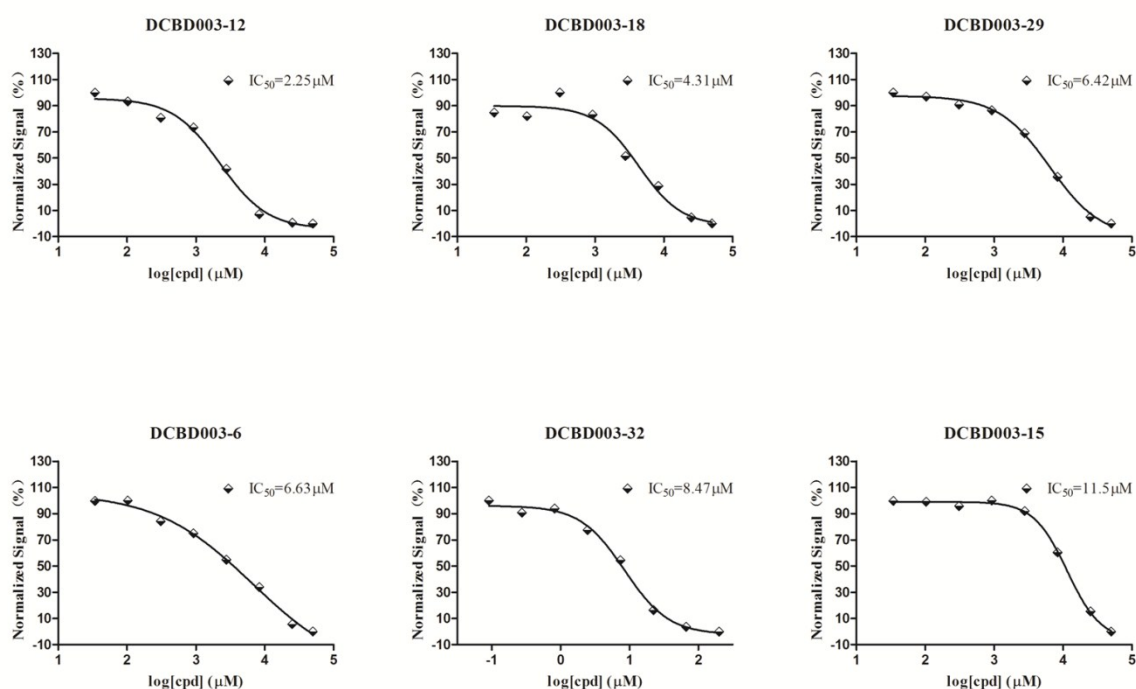

Figure S1. The inhibitory activity of several compounds in Table 1 at different concentrations against the first bromodomain of BRD4. The  $IC_{50}$  values were calculated and the curves were plotted using the software GraphPad.

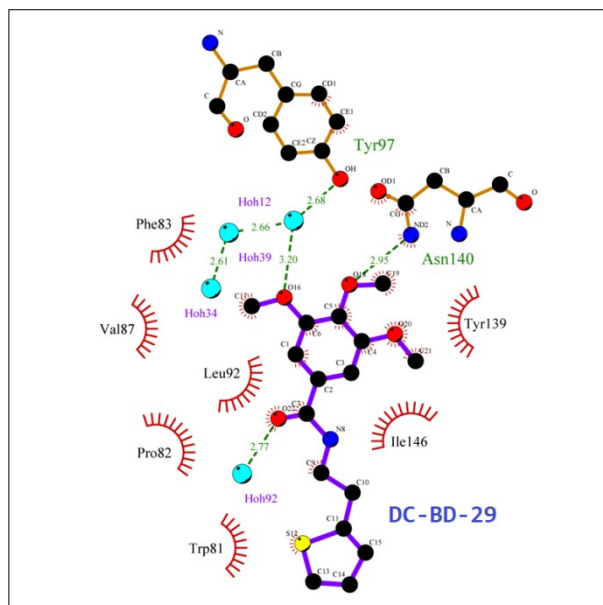

Figure S2. The hydrogen bonds and hydrophobic contacts formed by compound DC-BD-29 with the first bromodomain of BRD4, revealed by the solved crystal structure.

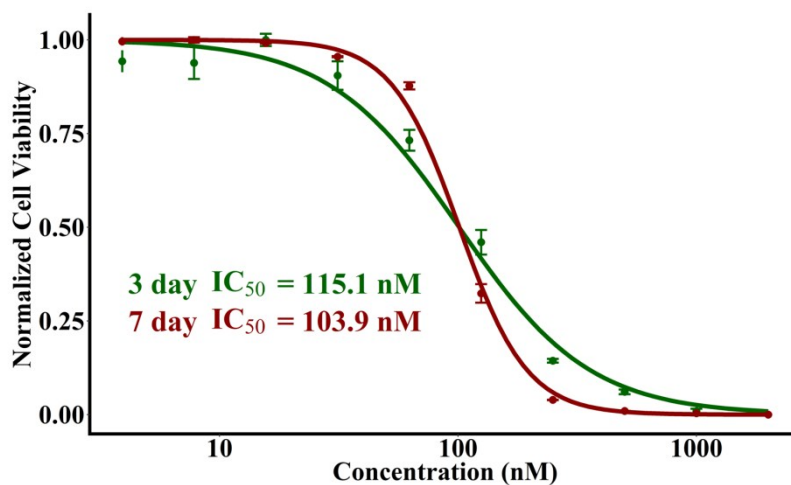

Figure S3. The cellular inhibition of compound I-BET151 against the MV4-11 cells, the  $IC_{50}$  values are 115.1 nM for three days after treatment and 103.9 nM for seven days after treatment.

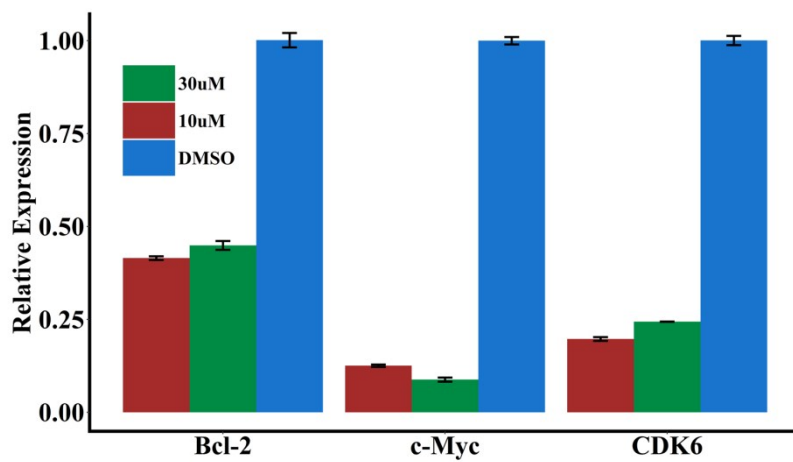

Figure S4. Compound I-BET151 decreased the expression of BRD4 downstream genes Bcl-2, c-Myc, and CDK6, after incubation for 6 hours, at the concentrations of 10  $\mu$ M and 30  $\mu$ M.

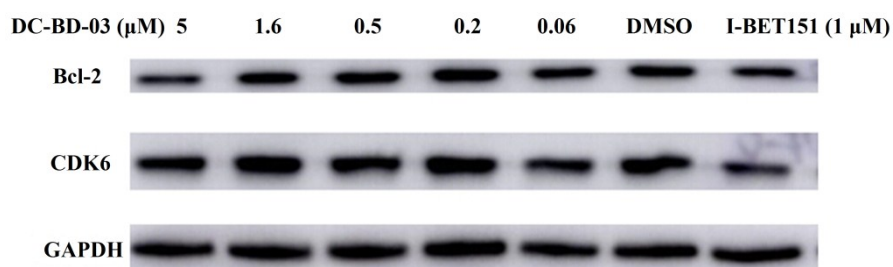

Figure S5. The effect of compound DC-BD-03 against the protein abundance of Bcl-2 and CDK6, at different concentrations, in comparison with the positive control I-BET151.

Table S1. The information for top 50 compounds in the first round AlphaScreen assay.

| NO. | Structure                                                                           | 50 $\mu$ M Inhibition(%) <sup>a</sup> |
|-----|-------------------------------------------------------------------------------------|---------------------------------------|
| 1   | 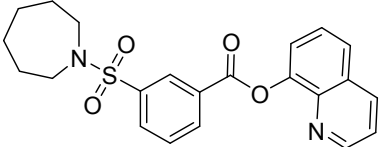   | 68.75                                 |
| 2   |    | 98.63                                 |
| 3   |   | 66.62                                 |
| 4   |  | 67.70                                 |
| 5   |  | 91.02                                 |
| 6   |  | 88.01                                 |

|    |                                                                                     |       |
|----|-------------------------------------------------------------------------------------|-------|
| 7  | 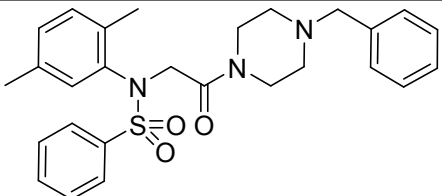   | 85.93 |
| 8  |    | 68.82 |
| 9  |    | 75.21 |
| 10 |   | 74.78 |
| 11 |  | 98.74 |
| 12 |  | 65.84 |
| 13 |  | 63.99 |

14

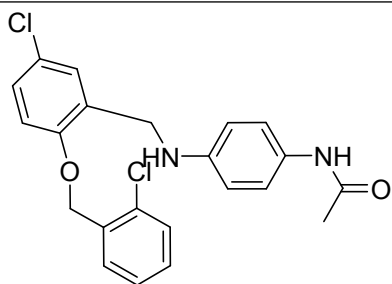

63.43

15

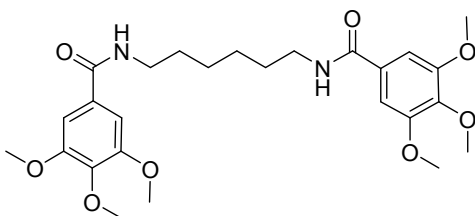

61.77

16

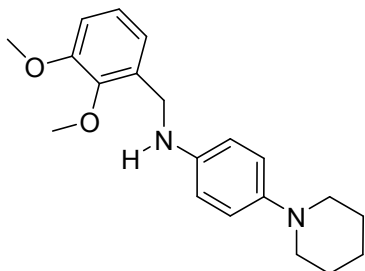

82.91

17

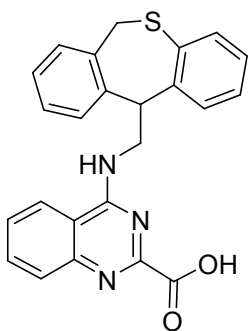

101.55

18

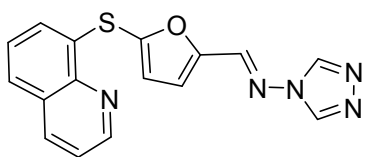

101.2

19

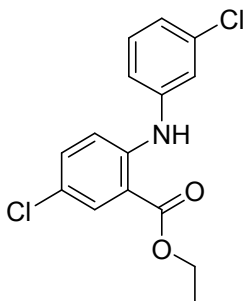

94.93

20

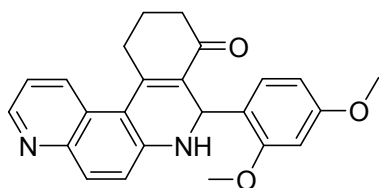

78.54

21

60.23

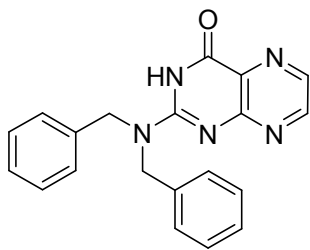

22

66.81

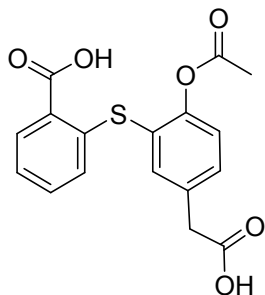

2

61.56

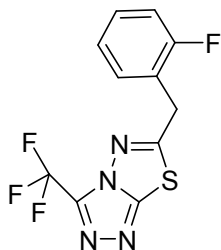

24

84.96

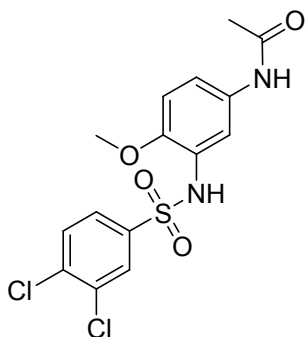

25

91.09

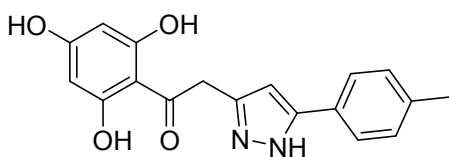

26

60.38

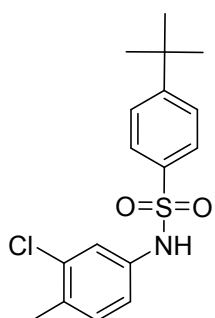



27

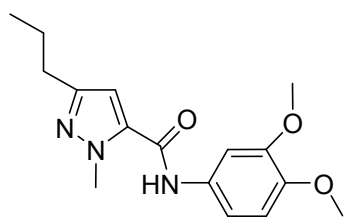

65.88

28

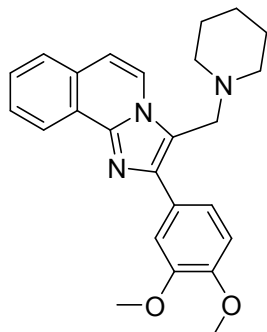

86.99

29

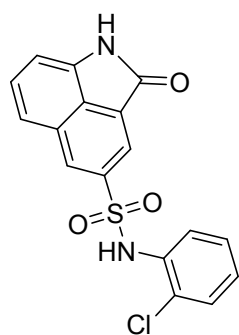

68.47

30

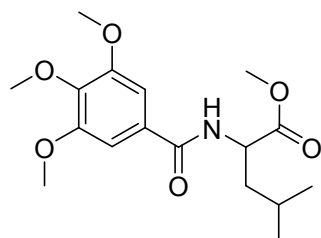

68.53

31

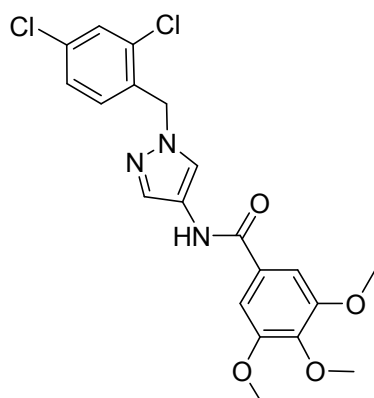

74.76

32

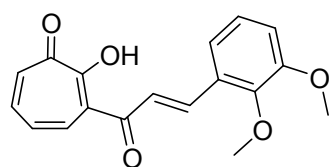

95.68

33

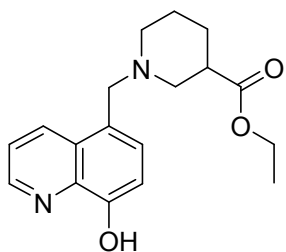

100.31

34

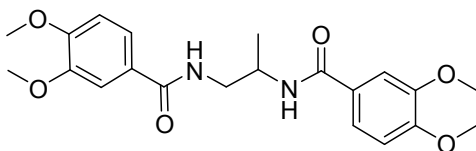

191.37

35

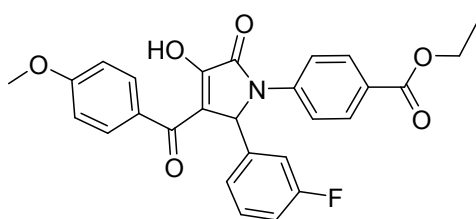

70.31

36

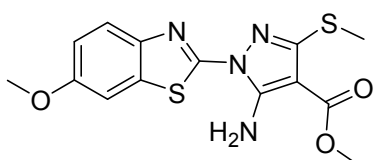

64.01

37

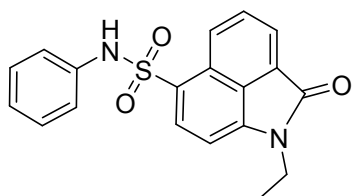

60.40

38

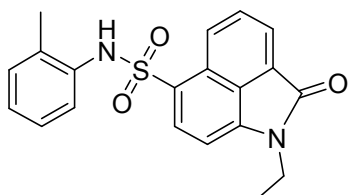

91.66

39

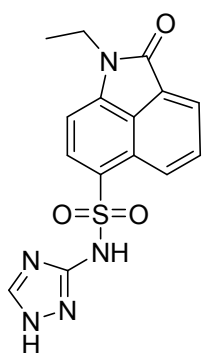

78.20

40

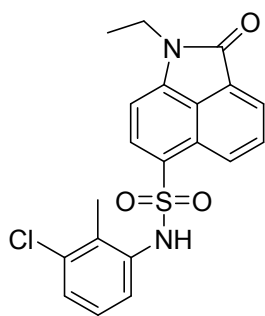

65.79

41

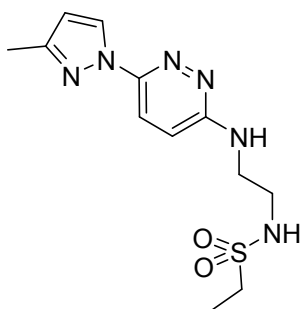

84.11

42

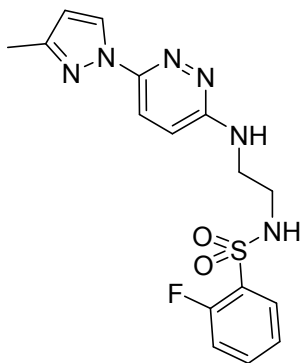

78.86

43

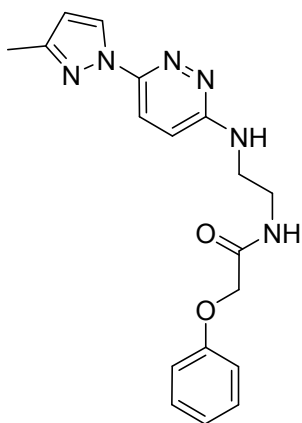

75.16

44

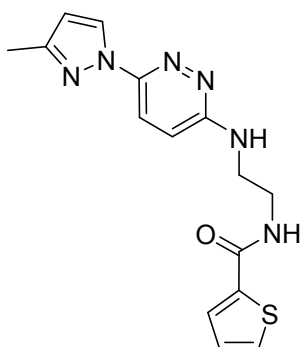

62.56

45

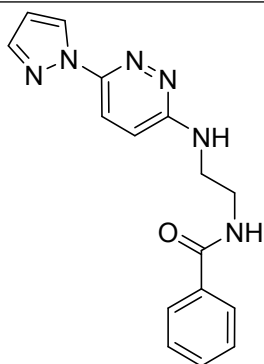

92.69

46

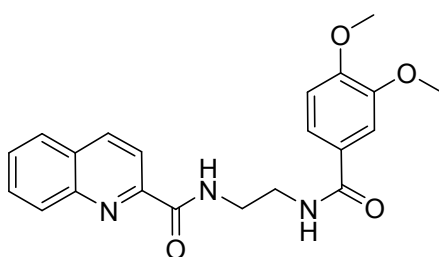

64.75

47

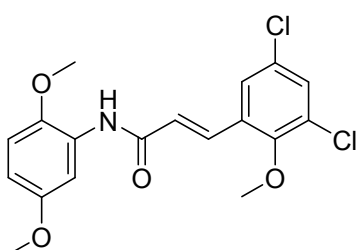

64.56

48

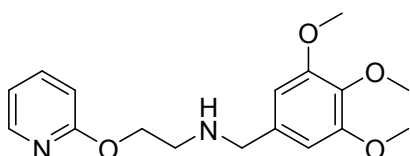

84.25

49

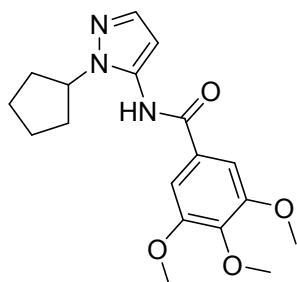

80.45

50

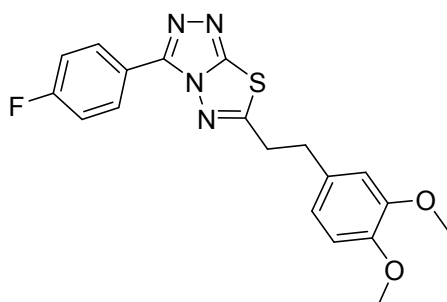

65.39

<sup>a</sup>The value of inhibition was calculated from the Alphascreen assay.

Table S2. The structures of DC-BD-03 series of compounds, and their inhibitory activities against the first bromodomain of BRD4, from binding with acetylated lysines. (Continued after Table 1).

| Compound ID | Compound Structure                                                                  | IC <sub>50</sub> (μM) | Inhibition (50 μM) |
|-------------|-------------------------------------------------------------------------------------|-----------------------|--------------------|
| DC-BD-10    | 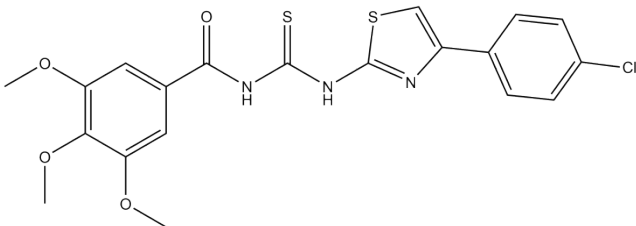   | >50                   |                    |
| DC-BD-13    |    |                       | 80%                |
| DC-BD-14    |   | >50                   |                    |
| DC-BD-20    |  |                       | 70%                |
| DC-BD-23    |  |                       | 80%                |
| DC-BD-28    |  |                       | 80%                |

|          |                                                                                   |     |
|----------|-----------------------------------------------------------------------------------|-----|
| DC-BD-33 | 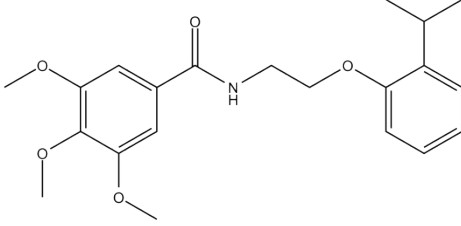 | >50 |
| DC-BD-34 |  | >50 |
| DC-BD-35 |  | >50 |

Table S3. The IC<sub>50</sub> of compound DC-BD-03 on other BET bromodomains.

| Cpd      | IC <sub>50</sub> <sup>c</sup> (uM) on |           |         |         |
|----------|---------------------------------------|-----------|---------|---------|
|          | BRD2(1,2)                             | BRD3(1,2) | BRD4(2) | BRDT(1) |
| DC-BD-03 | 43                                    | 19        | > 50    | > 50    |

<sup>c</sup> The value of IC<sub>50</sub> was calculated from the Alphascreen assay.

Table S4. The inhibition rates of compound DC-BD-03 for different BRD proteins.

| Target | Inh% at 100μM | Inh% at 50μM      |
|--------|---------------|-------------------|
| BRD7   | 8%            | N.I. <sup>b</sup> |
| BRD9   | 3%            | N.I.              |
| FLAZ   | N.I.          | N.I.              |
| SMACAR | N.I.          | N.I.              |

<sup>b</sup>N.I. represents no inhibition.

Table S5. X-Ray diffraction data collection and refinement statistics.

|                                |                               |
|--------------------------------|-------------------------------|
| Data Set Title                 | DC-BD-29                      |
| Wavelength                     | 0.978                         |
| Resolution range               | 39.73 - 1.591 (1.648 - 1.591) |
| Space group                    | P 21 21 21                    |
| Unit cell                      | 32.322 47.291 79.466 90 90 90 |
| Total reflections              | 218990 (20931)                |
| Unique reflections             | 16972 (1636)                  |
| Multiplicity                   | 12.9 (12.8)                   |
| Completeness (%)               | 100 (100)                     |
| Mean I/sigma(I)                | 26.53 (11.28)                 |
| Wilson B-factor                | 11.75                         |
| R-merge                        | 0.081 (0.244)                 |
| R-meas                         | 0.085 (0.254)                 |
| CC1/2                          | 0.999 (0.99)                  |
| CC*                            | 1 (0.998)                     |
| Reflections used in refinement | 16971 (1636)                  |
| Reflections used for R-free    | 873 (84)                      |
| R-work                         | 0.163 (0.158)                 |
| R-free                         | 0.190 (0.173)                 |
| CC(work)                       | 0.964 (0.953)                 |
| CC(free)                       | 0.968 (0.934)                 |
| Number of non-hydrogen atoms   | 1216                          |
| macromolecules                 | 1037                          |
| ligands                        | 22                            |
| Protein residues               | 125                           |
| RMS(bonds)                     | 0.007                         |
| RMS(angles)                    | 0.91                          |
| Ramachandran favored (%)       | 98                            |
| Ramachandran allowed (%)       | 1.6                           |
| Ramachandran outliers (%)      | 0                             |
| Rotamer outliers (%)           | 0.85                          |
| Clashscore                     | 1.91                          |
| Average B-factor               | 15.09                         |
| macromolecules                 | 13.34                         |
| ligands                        | 23.10                         |
| solvent                        | 25.49                         |
